# Supplementary material for: Simple non-fused small-molecule acceptors with bithiazole core: synthesis, crystallinity and photovoltaic properties
Source: Royal Society of Chemistry journal article supplement (doi:10.1039/d1ma00954k), 2021-11-08

## Supporting Information

### **Simple non-fused small-molecule acceptors with bithiazole core: synthesis, crystallinity and photovoltaic properties**

Jiali Guo<sup>a</sup>, Wei Tang<sup>a,b</sup>, Yingshuang Zhang<sup>a</sup>, Can Qian<sup>a</sup>, Junfeng Wang<sup>a</sup>, Hua Tan<sup>a\*</sup>,  
Weiguo Zhu<sup>a,\*</sup>

<sup>a</sup> *School of Materials Science and Engineering, Jiangsu Engineering Laboratory of Light-Electricity-Heat Energy-Converting Materials and Applications, Jiangsu Collaborative Innovation Center of Photovoltaic Science and Engineering, National Experimental Demonstration Center for Materials Science and Engineering, Changzhou University, Changzhou 213164, P. R. China*

<sup>b</sup> *College of Chemistry, Xiangtan University, Xiangtan 411105, P. R. China*

Email addresses:

zhuwg18@126.com (W. Zhu)

tanhua815@126.com (H. Tan)

## Content

**1. General experimental information and characterizations.**

**2. Devices fabrication and characterizations.**

**3. Supplementary figures and tables.**

**Figure S1.** TGA curve of BTz-4F-0, BTz-4F-1 and BTz-4Cl-1.

**Figure S2-4.** The detail optimal data of PSCs.

**Figure S5.** Structure characterization of the BTz-4F-0, BTz-4F-1 and BTz-4Cl-1.

## 1. General experimental information and characterizations

All manipulations were performed under dry nitrogen flow.  $^1\text{H}$  NMR spectra were recorded at 400 MHz and 500 MHz on Bruker Avance-400 and Bruker Avance-500 spectrometer using  $\text{CDCl}_3$  as solvent and tetramethylsilane (TMS) as internal standard. Mass spectra (MS) were measured on a Bruker Daltonics BIFLEX III MALDI-TOF analyzer. Thermo-gravimetric analyses (TGA) were carried out on a Perkin-Elmer Diamond TG/DTA thermal analyzer at a scan rate of  $10\text{ }^\circ\text{C min}^{-1}$  under nitrogen atmosphere. UV-Vis absorption spectra were recorded on a Shimadzu UV-2600 spectrophotometer. Cyclic voltammetry (CV) was conducted on a CHI630E voltammetric analyzer under nitrogen atmosphere in an anhydrous acetonitrile solution of tetrabutyl- ammonium hexafluorophosphate ( $\text{Bu}_4\text{NPF}_6$ ) (0.1 M) at a scan rate of  $20\text{ mV s}^{-1}$ . The theoretical study was performed on the 6-31G\*\* basis set in Gaussian 09 using the density functional theory (DFT), as approximated by the B3LYP. The surface morphology of the J71: BTz-4F1 and J71: BTz-4Cl-1 blend films was investigated by an atomic force microscopy (AFM).

### 1.1 Synthesis of compound **2a**

Compound **1a** (1.07 g, 6.36 mmol) was dissolved in anhydrous THF (40 mL) and the solution was cooled to  $-78\text{ }^\circ\text{C}$  under nitrogen atmosphere. 2.0 M of lithium diisopropyl-amide (13 mL, 25.40 mmol) was added carefully. After stirring for 2 h, 1.0 M of trimethyltin chloride (22 mL, 22.20 mmol) was added into the mixture in one portion. After 30 minutes, the reaction mixture was stirred for 12 h at room temperature. It was

then poured into water and extracted with CH<sub>2</sub>Cl<sub>2</sub>. The combined organic phase was dried over anhydrous MgSO<sub>4</sub>. After removal of the solvent, compound **2a** was obtained as pale yellow solid powder (2.20 g, yield 70.0 %). <sup>1</sup>H NMR (400 MHz, CDCl<sub>3</sub>) δ 7.80 (s, 2H), 0.45 (s, 18H).

### 1.2 Synthesis of compound **4a**

A mixture of compound **2a** (1.00 g, 2.00 mmol), Pd<sub>2</sub>(dba)<sub>3</sub> (40.0 mg), P(o-tol)<sub>3</sub> (50.0mg) and compound **3** (1.80 g, 5.00 mmol) was dissolved in 40 mL anhydrous toluene, then stirred for 18 h at 110 °C under nitrogen atmosphere. After cooled to room temperature, the reaction solution was washed with water and extracted with CH<sub>2</sub>Cl<sub>2</sub>, then the combined organic phase was dried over anhydrous MgSO<sub>4</sub>. After removal of the solvent, the crude product was purified by column chromatography eluting with PE: DCM (1:2, *V:V*) to obtain compound **4a** as bright yellow viscous solid (0.48 g, yield 33.10%). <sup>1</sup>H NMR (400 MHz, CDCl<sub>3</sub>) δ 9.89 (s, 2H), 8.02 (s, 2H), 7.62 (s, 6H), 2.75 (d, *J* = 7.2 Hz, 4H), 1.72 (m, 2H), 1.25-1.22 (m, 32H), 0.87-0.84 (m, 12H).

### 1.3 Synthesis of BTz-4F-0

A mixture of compound **4a** (0.18 g, 0.25 mmol), compound **5** (0.32 g, 1.40 mmol) and pyridine (0.20mL) was dissolved in 25 mL anhydrous tetrahydrofuran, then stirred for 3 h at 50 °C under nitrogen atmosphere. After cooled to room temperature, the crude product was purified by column chromatography eluting with CHCl<sub>3</sub>. Then the resulting concentrated solution was precipitated with methanol and filtered with suction, and dried under vacuum to obtain a reddish brown solid with metallic luster (0.18 g, yield 62.5%). <sup>1</sup>H NMR (500 MHz, CDCl<sub>3</sub>) δ 8.83 (s, 2H), 8.57 (d, *J* = 15.9 Hz, 2H), 8.22 (s,

2H), 7.76-7.69 (m, 2H), 2.79 (d,  $J = 7.1$  Hz, 4H), 1.77-1.74 (m, 2H), 1.27-1.23 (m, 32H), 0.87-0.84 (m, 12H).

#### 1.4 Synthesis of compound **2b**

Compound **1b** (0.5 g, 2.55 mmol) was dissolved in anhydrous THF (50 mL) and the solution was cooled to  $-78$  °C under nitrogen atmosphere. 2.0 M of lithium diisopropyl-amide (3.82 mL, 7.64 mmol) was added carefully. After stirring for 2 h, 1.0 M of trimethyltin chloride (7.64 mL, 7.64 mmol) was added into the mixture in one portion. After 30 minutes, the reaction mixture was stirred for 12 h at room temperature. It was then poured into water and extracted with  $\text{CH}_2\text{Cl}_2$ . The combined organic phase was dried over anhydrous  $\text{MgSO}_4$ . After removal of the solvent, compound **2b** was obtained as pale yellow solid powder (0.89 g, yield 66.87 %).  $^1\text{H}$  NMR (500 MHz,  $\text{CDCl}_3$ )  $\delta$  2.53 (s, 6H), 0.43 (s, 18H).

#### 1.5 Synthesis of compound **4b**

A mixture of compound **2b** (0.50 g, 0.96 mmol),  $\text{Pd}_2(\text{dba})_3$  (17 mg),  $\text{P}(\text{o-tol})_3$  (23mg) and compound **3** (0.80 g, 2.30 mmol) was dissolved in 25 mL anhydrous toluene, then stirred for 18 h at  $110$  °C under nitrogen atmosphere. After cooled to room temperature, the reaction solution was washed with water and extracted with  $\text{CH}_2\text{Cl}_2$ , then the combined organic phase was dried over anhydrous  $\text{MgSO}_4$ . After removal of the solvent, the crude product was purified by column chromatography eluting with PE: DCM (1:2,  $V:V$ ) to obtain compound **4b** as bright yellow viscous solid (0.33 g, yield 45.64%).  $^1\text{H}$  NMR (500 MHz,  $\text{CDCl}_3$ )  $\delta$  9.91 (s, 2H), 7.64 (s, 2H), 2.55 (d,  $J = 7.1$  Hz, 4H), 2.45 (s, 6H), 1.60 (s, 2H), 1.17 (s, 32H), 0.84 (d,  $J = 5.7$  Hz, 12H).

## 1.6 Synthesis of BTz-4F-1

A mixture of compound **4b** (0.24 g, 0.32 mmol), compound **5** (0.29 g, 1.28 mmol) and pyridine (0.20 mL) was dissolved in 25 mL anhydrous tetrahydrofuran, then stirred for 1 h at 50 °C under nitrogen atmosphere. After cooled to room temperature, the crude product was purified by column chromatography eluting with CHCl<sub>3</sub>. Then the resulting concentrated solution was precipitated with methanol and filtered with suction, and dried under vacuum to obtain a reddish brown solid with metallic luster (0.32 g, yield 84.0%). <sup>1</sup>H NMR (400 MHz, CDCl<sub>3</sub>) δ 8.86 (s, 2H), 8.58 (dd, J = 9.8, 6.5 Hz, 2H), 7.74 (s, 4H), 2.61 (d, J = 7.1 Hz, 4H), 2.56 (s, 6H), 1.62 (s, 2H), 1.21 (d, J = 23.0 Hz, 32H), 0.84 (m, 12H). MS (MALDI-TOF) of C<sub>66</sub>H<sub>64</sub>F<sub>4</sub>N<sub>6</sub>O<sub>2</sub>S<sub>4</sub> for [M]<sup>+</sup>: calcd. 1177.51; found: 1177.15.

## 1.7 Synthesis of BTz-4Cl-1

A mixture of compound **4b** (90 mg, 0.12 mmol), compound **6** (125.75 mg, 0.48 mmol) and pyridine (0.20 mL) was dissolved in 15 mL anhydrous tetrahydrofuran, then stirred for 1 h at 50 °C under nitrogen atmosphere. After cooled to room temperature, the crude product was purified by column chromatography eluting with CHCl<sub>3</sub>. Then the resulting concentrated solution was precipitated with methanol and filtered with suction, and dried under vacuum to obtain a reddish brown solid with metallic luster (100 mg, yield 67.59%). <sup>1</sup>H NMR (500 MHz, CDCl<sub>3</sub>) δ 8.88 (s, 2H), 8.81 (s, 2H), 8.00 (s, 2H), 7.75 (s, 2H), 2.62 (d, J = 7.1 Hz, 4H), 2.57 (s, 6H), 1.62 (s, 2H), 1.18 (s, 32H), 0.84 (d, J = 4.8 Hz, 12H). MS (MALDI-TOF) of C<sub>66</sub>H<sub>64</sub>Cl<sub>4</sub>N<sub>6</sub>O<sub>2</sub>S<sub>4</sub> for [M]<sup>+</sup>: calcd. 1243.32; found: 1243.32.

## 2. Devices fabrication and characterizations

Bulk heterojunction organic solar cells were fabricated with the following conventional structure: ITO/ PEDOT: PSS/active layer/PFN-Br/Al. ITO substrates were cleaned and then dried in an oven at 85°C for 12 hours. The PEDOT: PSS precursor was spin-coated onto the ITO surface at 3000 r.p.m. and thermal annealed for 15 min in air. The thickness of the ITO film are about 40 nm. Then the PEDOT: PSS-coated substrates were transferred into a nitrogen-filled glove box. Then blend solution was spin-coated on the PEDOT: PSS layer. Then evaporated 10 nm thick PFN-Br and 100 nm thick Al on the active layer. The current density-voltage ( $J-V$ ) characteristics of the devices under illumination of AM 1.5 G solar simulator (Newport, 100 mW cm<sup>-2</sup>, calibrated by a silicon reference cell) were measured on a computer-controlled Keithley 2420 source measure unit. The external quantum efficiencies ( $EQE$ ) of organic solar cells were analyzed using a certified Newport incident photon conversion efficiency (IPCE) measurement system (Model 66902).

Optimal fabricating condition was acquired based on J71: BTz-4F-1, and then BTz-4Cl-1-based devices adopted the same condition directly without special optimization.

### 3. Supplementary figures and tables.

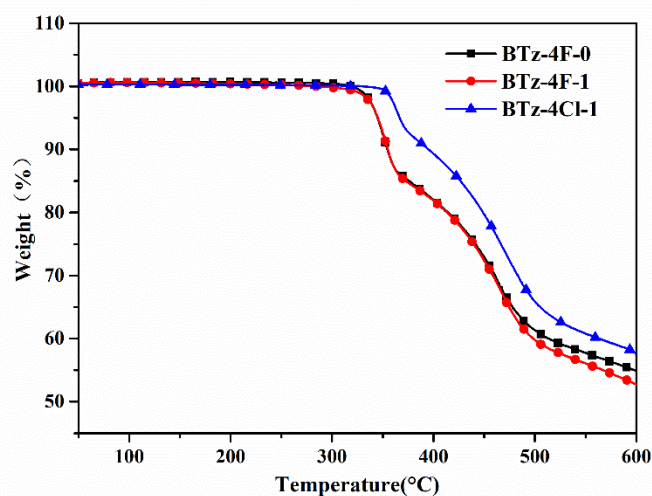

Fig. S1 TGA curve of BTz-4F-0, BTz-4F-1 and BTz-4Cl-1.

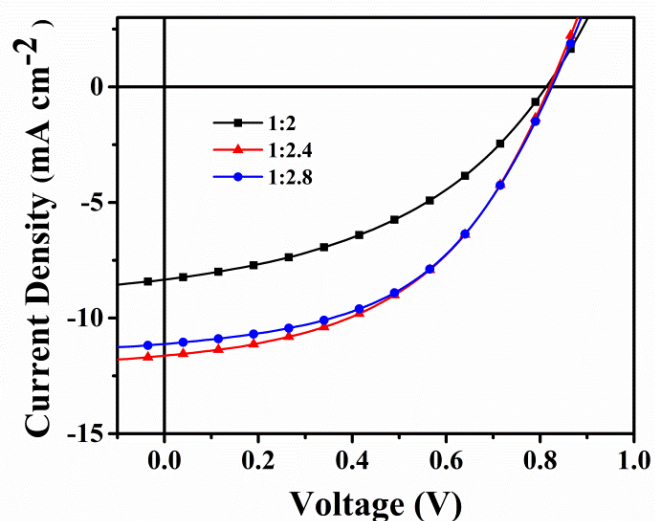

Fig. S2  $J$ - $V$  curve of the OSCs based on J71: BTz-4F-1 at different D/A ratios.

**Table S1** Photovoltaic properties of the OSCs based on J71: BTz-4F-1 at different D/A ratios

|           | $V_{oc}$ /V | $J_{sc}$ /mA cm <sup>-2</sup> | $FF$ /% | PCE /% <sup>a</sup> |
|-----------|-------------|-------------------------------|---------|---------------------|
| D/A 1:2   | 0.81        | 8.30                          | 41.99   | 2.83 (2.79)         |
| D/A 1:2.4 | 0.82        | 11.58                         | 47.35   | 4.49 (4.47)         |
| D/A 1:2.8 | 0.82        | 11.07                         | 48.95   | 4.47(4.46)          |

<sup>a</sup> The average PCE in parentheses were obtained from 5 devices.



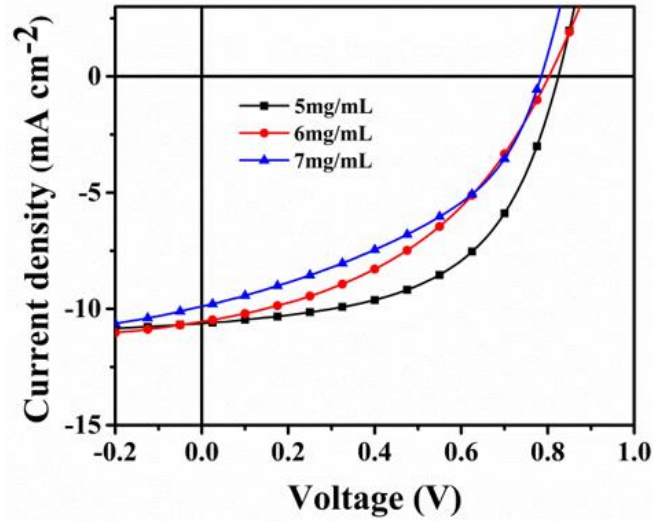

Fig. S3  $J$ - $V$  curve of the OSCs based on J71: BTz-4F-1 at different donor concentration.

**Table S2** Photovoltaic properties of the OSCs based on J71: BTz-4F-1 at different donor concentration

|                  | $V_{oc}$ /V | $J_{sc}$ / $\text{mA cm}^{-2}$ | $FF$ /% | PCE /% <sup>a</sup> |             |
|------------------|-------------|--------------------------------|---------|---------------------|-------------|
| J71 in CF(mg/mL) | 5           | 0.82                           | 10.59   | 54.51               | 4.76 (4.74) |
|                  | 6           | 0.80                           | 10.87   | 42.47               | 3.59 (3.56) |
|                  | 7           | 0.78                           | 9.88    | 42.85               | 3.32 (3.28) |

<sup>a</sup> The average PCE in parentheses were obtained from 5 devices.

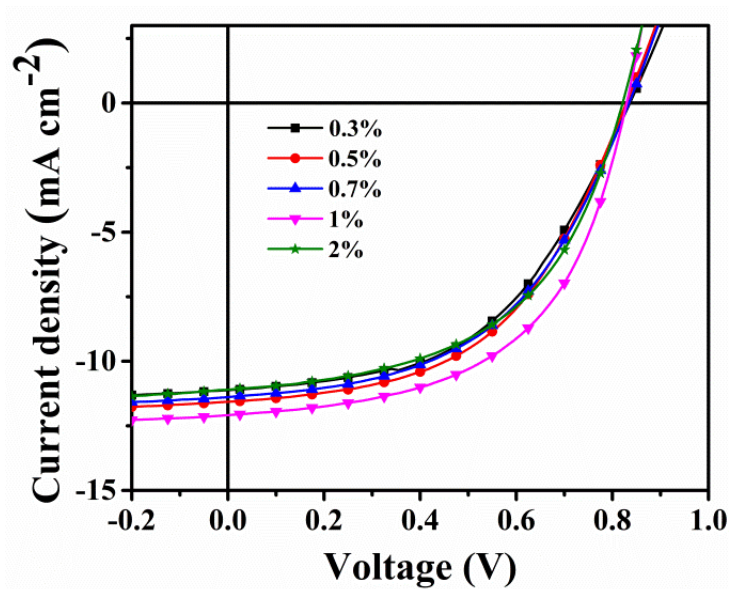

Fig. S4  $J$ - $V$  curve of the OSCs based on J71: BTz-4F-1 at different amount of DIO additive

**Table S3** Photovoltaic properties of the OSCs based on J71: BTz-4F-1 at different amount of DIO additive

|     | $V_{oc}$ /V | $J_{sc}$ /mA cm <sup>-2</sup> | FF /% | PCE /% <sup>a</sup> |             |
|-----|-------------|-------------------------------|-------|---------------------|-------------|
| DIO | 0.3%        | 0.84                          | 11.08 | 50.12               | 4.64 (4.60) |
|     | 0.5%        | 0.83                          | 11.54 | 50.92               | 4.87(4.85)  |
|     | 0.7%        | 0.83                          | 11.35 | 50.13               | 4.74 (4.72) |
|     | 1%          | 0.84                          | 12.28 | 55.30               | 5.72 (5.66) |
|     | 2%          | 0.82                          | 11.07 | 52.25               | 4.75 (4.72) |

<sup>a</sup> The average PCE in parentheses were obtained from 5 devices.

**Fig. S5** Structure characterization of the BTz-4F-0, BTz-4F-1 and BTz-4Cl-1.

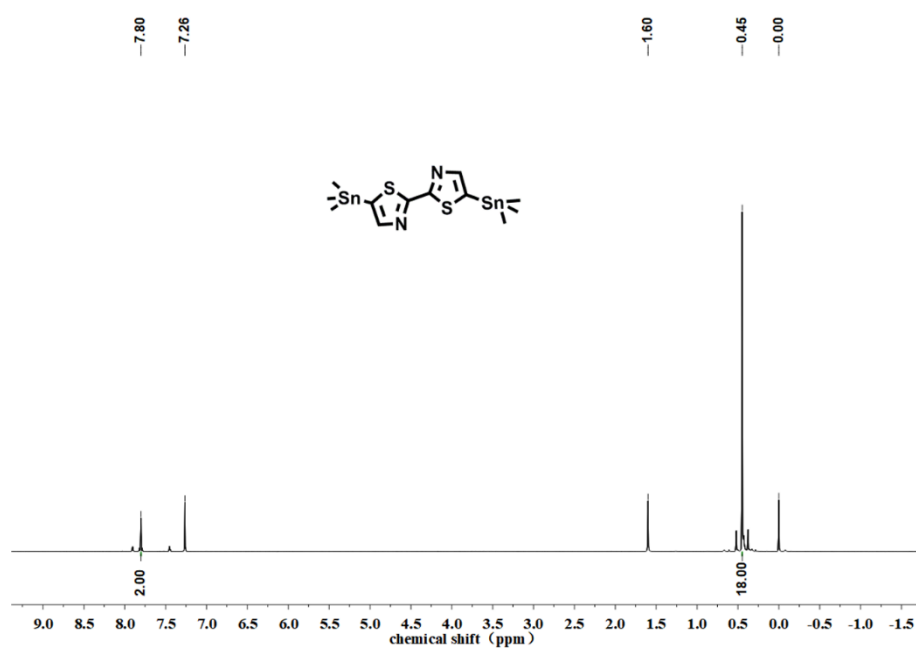

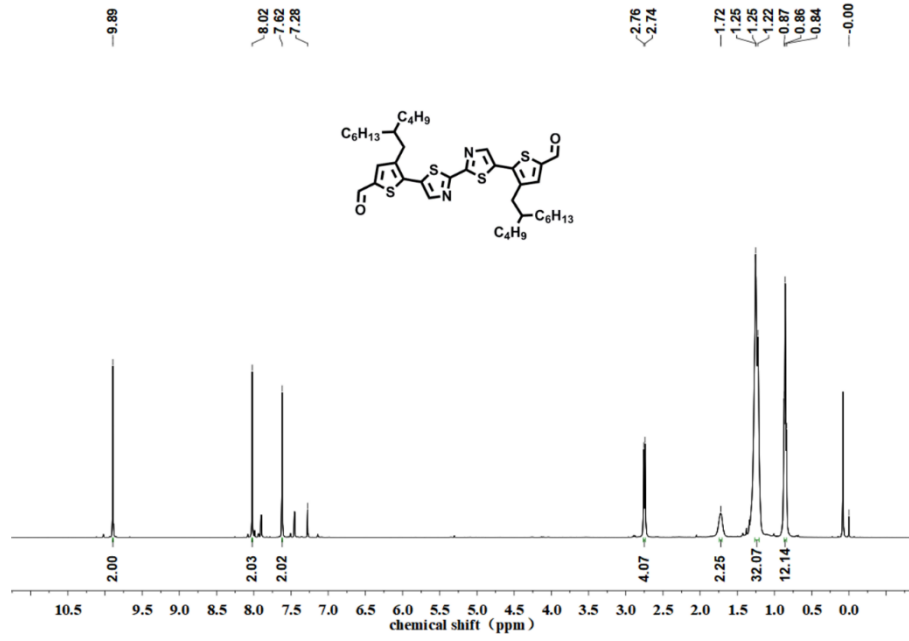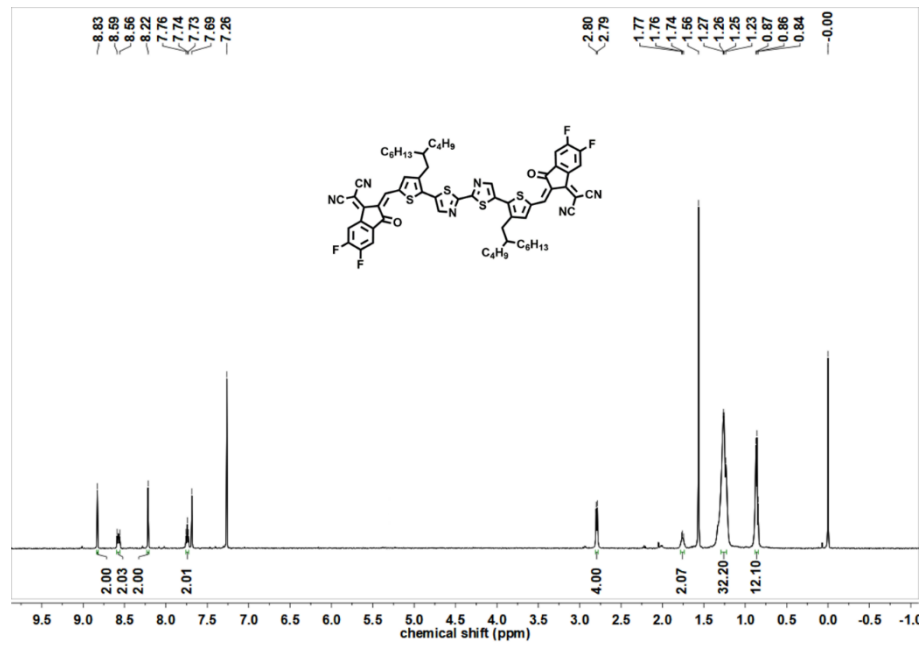

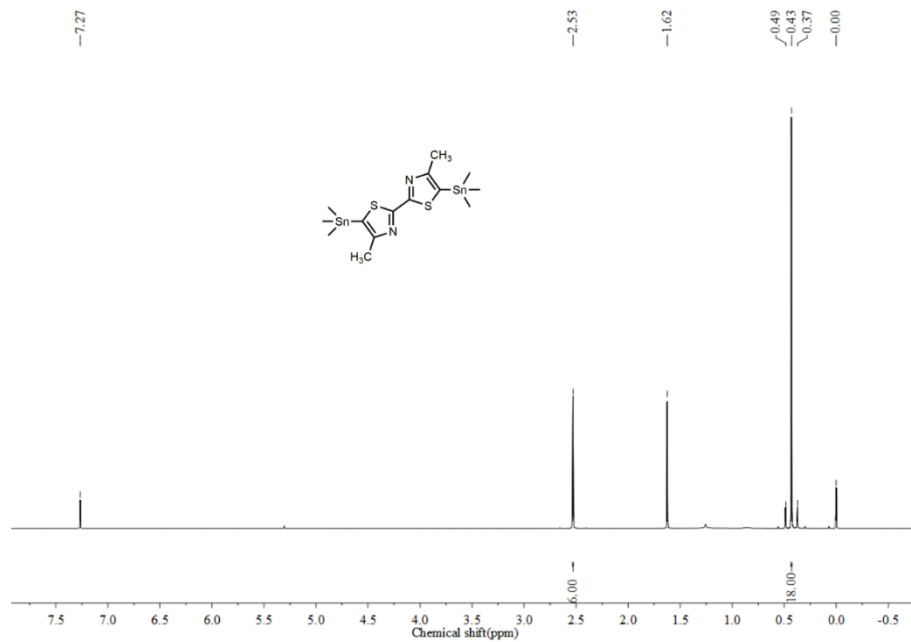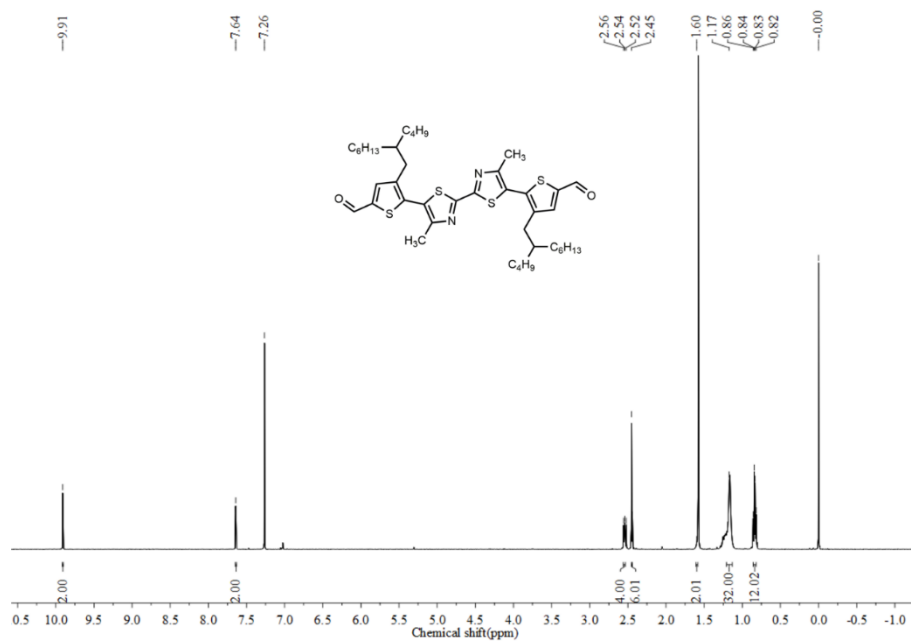

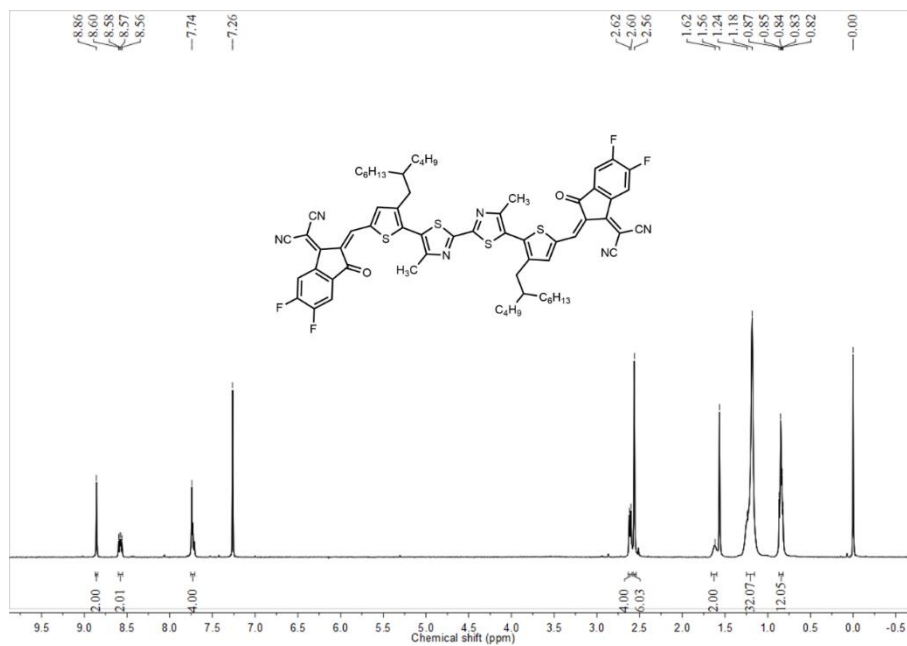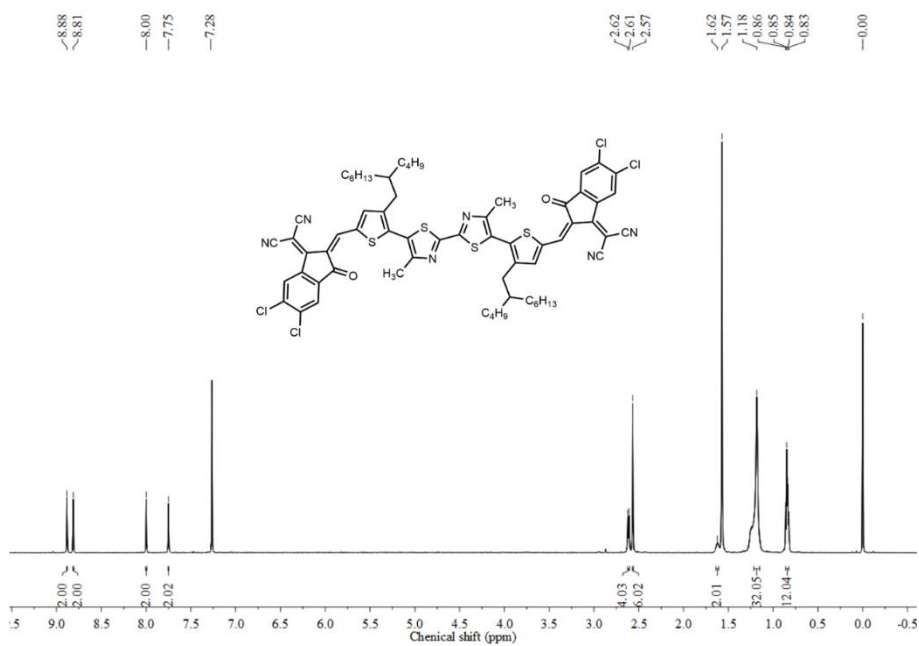

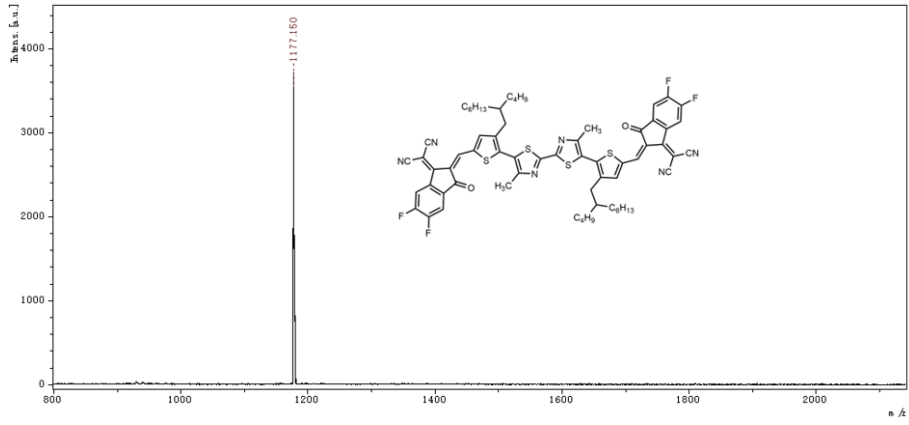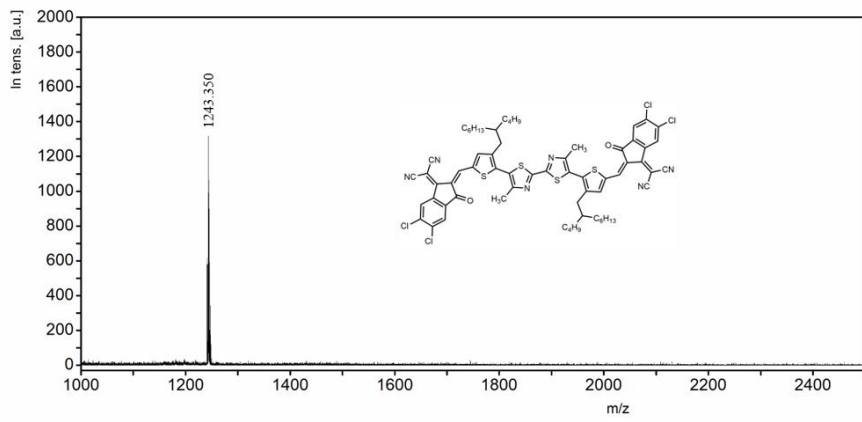

Supplement: d1ma00954k1.pdf [file d1ma00954k1.pdf]
